# Supplementary material for: Does portal vein anatomy influence intrahepatic distribution of metastases from colorectal cancer?
Source: PubMed Central journal article supplement (PMC11406940; doi:10.2478/raon-2024-0039), 2024-09-15
Supplement: raon-2024-0039-sm.pdf [file raon-2024-0039-sm.pdf]

## Does portal vein anatomy influence intrahepatic distribution of metastases from colorectal cancer?

Anaïs Tribolet, Maxime Barat, David Fuks, Mathilde Aissaoui, Philippe Soyer, Ugo Marchese, Martin Gaillard, Alexandra Nassar, Jean Hardwigen, Stylianos Tzedakis

doi: 10.2478/raon-2024-0039

**SUPPLEMENTARY TABLE 1.** Magnetic resonance imaging sequences and parameters in the two centers

| Sequence                     |               | Diffusion-weighted    | VIBE DIXON  | FS T2 BLADE           | Dynamic multiphase contrast-enhanced |
|------------------------------|---------------|-----------------------|-------------|-----------------------|--------------------------------------|
| Plane                        |               | Transverse            | Transverse  | Transverse            | Transverse                           |
| MR acquisition type          |               | 2D                    | 3D          | 2D                    | 3D                                   |
| Slice thickness (mm)         | Centre 1 1.5T | 5                     | 3           | 5                     | 2.2                                  |
|                              | Centre 1 3T   | 5                     | 2           | 5                     | 2                                    |
|                              | Centre 2 1.5T | 8                     | 3           | 5.5                   | 3                                    |
| Gap (mm)                     | Centre 1 1.5T | 0.5                   | -           | 1                     | -                                    |
|                              | Centre 1 3T   | 0.5                   | -           | 1                     | -                                    |
|                              | Centre 2 1.5T | 1.6                   | -           | 1.1                   | -                                    |
| Repetition time (ms)         | Centre 1 1.5T | 6000                  | 6.83        | 2540                  | 4                                    |
|                              | Centre 1 3T   | 3300                  | 3.92        | 3234                  | 3.92                                 |
|                              | Centre 2 1.5T | 1200                  | 6.88        | 1200                  | 4.62                                 |
| Echo time (ms)               | Centre 1 1.5T | 56                    | 2.4         | 121                   | 1.5                                  |
|                              | Centre 1 3T   | 46                    | 1.23        | 105                   | 1.23                                 |
|                              | Centre 2 1.5T | 143                   | 2.39        | 143                   | 2.28                                 |
| b-value (s/mm <sup>2</sup> ) |               | 50, 400, 800          | -           | -                     | -                                    |
| Flip angle (°)               | Centre 1 1.5T | 90                    | 10          | 142                   | 14                                   |
|                              | Centre 1 3T   | 90                    | 9           | 90                    | 9                                    |
|                              | Centre 2 1.5T | 160                   | 10          | 160                   | 10                                   |
| Pixel bandwidth (Hz)         | Centre 1 1.5T | 2440                  | 475         | 500                   | 345                                  |
|                              | Centre 1 3T   | 2322                  | 930         | 744                   | 930                                  |
|                              | Centre 2 1.5T | 475                   | 600         | 475                   | 400                                  |
| Acquisition matrix           | Centre 1 1.5T |                       | 320 × 182   | 256 × 256             | 384 × 234                            |
|                              | Centre 1 3T   | 128 × 104/ 140x112    | 256 × 146   | 320 × 88              | 256 × 146                            |
|                              | Centre 2 1.5T | 256 × 198             | 320 × 175   | 256 × 198             | 320 × 195                            |
| Respiratory control          |               | Respiratory-triggered | Breath-hold | Respiratory-triggered | Respiratory-triggered                |

2D = two-dimensional, 3D = three-dimensional, FS = fat saturated; VIBE = volumetric interpolated breath hold examination

All MR scans are Siemens Healthineers. BLADE is the name of periodically rotated overlapping parallel lines with enhanced reconstruction (PROPELLER) sequence of Siemens Healthcare.
